# Supplementary material for: Urchin-like Li4Ti5O12–carbon nanofiber composites for high rate performance anodes in Li-ion batteries
Source: Royal Society of Chemistry journal article supplement (doi:10.1039/c2jm31308a), 2012-01-01
Supplement: c2jm31308a.pdf [file c2jm31308a.pdf]

## Electronic Supplementary Information (ESI)

# Urchin-like $\text{Li}_4\text{Ti}_5\text{O}_{12}$ /carbon nanofiber composites for high rate performance anodes in Li-ion batteries

Biao ZHANG,<sup>a</sup> Yusi LIU,<sup>a</sup> Zhendong HUANG,<sup>a</sup> Seiwoon OH,<sup>a</sup> Yang YU,<sup>a</sup>  
Yiu-Wing Mai<sup>b</sup> and Jang-Kyo KIM<sup>\*a</sup>

<sup>a</sup> Department of Mechanical Engineering, Hong Kong University of Science and Technology, Clear Water Bay, Hong Kong, China. . Fax: +852-2358-1543; Tel: +852-2358-7207; E-mail: mejkkm@ust.hk

<sup>b</sup> Centre for Advanced Materials Technology, School of Aerospace, Mechanical and Mechatronic Engineering, University of Sydney, Sydney, NSW 2006, Australia

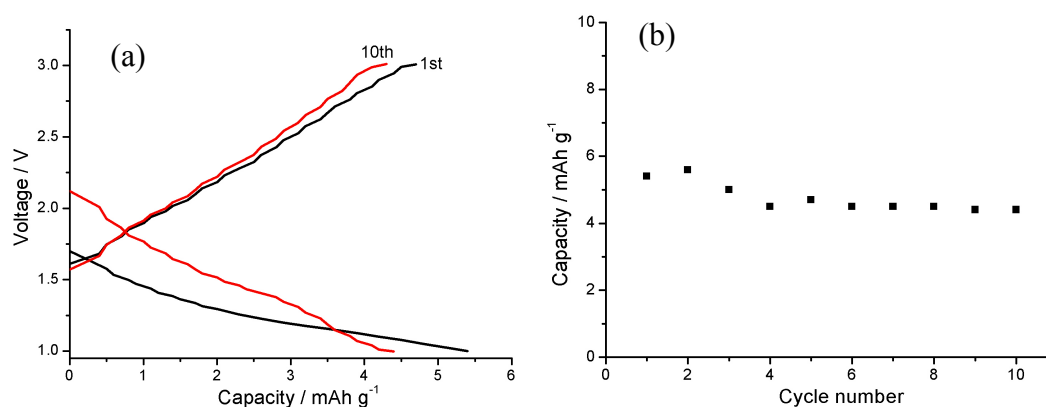

Fig. S1 (a) 1<sup>st</sup> and 10<sup>th</sup> charge/discharge curves and (b) cyclic performance of CNFs at 1C.
